# Supplementary material for: Vascular Smooth Muscle Cell-Derived Exosomal MicroRNAs Regulate Endothelial Cell Migration Under PDGF Stimulation
Source: MDPI journal article supplement (doi:10.3390/cells9030639), 2020-03-06
Supplement: s1 [file s1]

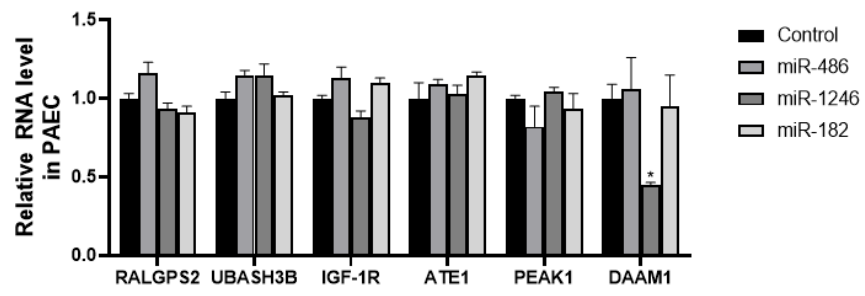

**Figure S1.** Levels of predicted target mRNAs in PAECs transfected with miRNA mimics.
